# Supplementary material for: Engineering considerations in the design of tissue specific bioink for 3D bioprinting applications
Source: Royal Society of Chemistry journal article supplement (doi:10.1039/d4bm01192a), 2024-10-23
Supplement: d4bm01192a1.pdf [file d4bm01192a1.pdf]

### **CRedit Contributor Roles:**

#### **Shivi Tripathi, M-Tech:**

Formal analysis (Lead)  
Investigation (lead)  
Methodology (lead)  
Validation (lead)  
Visualization (supporting)  
Writing - original draft (lead)  
Writing - review & editing (supporting)

#### **Madhusmita Dash, Ph. D:**

Investigation (supporting)  
Methodology (supporting)  
Visualization (supporting)  
Writing - original draft (supporting)  
Writing - review & editing (supporting)

#### **Ruchira Chakraborty, MSc.**

Methodology (supporting)  
Writing - original draft (supporting)  
Writing - review & editing (supporting)

#### **Harri Junaedi, Ph. D:**

Writing - original draft (supporting)  
Writing - review & editing (supporting)

#### **Prasoon Kumar, Ph. D:**

Conceptualization (supporting)  
Funding acquisition (supporting)  
Resources (supporting)  
Supervision (supporting)  
Visualization (supporting)  
Writing - review & editing (supporting)

#### **Shabir Hassan, Ph. D:**

Supervision (supporting)  
Visualization (supporting)  
Writing - review & editing (supporting)

#### **Hassan Mehboob, Ph. D:**

Resources (supporting)

Visualization (supporting)  
Writing - review & editing (supporting)

**Harpreet Singh, Ph. D:**

Visualization (supporting)  
Writing - review & editing (supporting)

**Himansu Nanda, Ph. D:**

Conceptualization (lead)  
Funding acquisition (lead)  
Project administration (lead)  
Resources (lead)  
Software (lead)  
Supervision (lead)  
Validation (supporting)  
Visualization (supporting)  
Writing- review & editing (lead)
